# Supplementary material for: Contribution of temporal data to predictive performance in 30-day readmission of morbidly obese patients
Source: PeerJ journal article supplement (doi:10.7717/peerj.3230), 2017-04-25
Supplement: Supplement1.pdf [file Supplement1.pdf]

Lasso Logistic Regression

| Dataset | Number of historical records | Performance Metrics |                |       |                |             |                |       |                |             |                |       |                |                |                    |
|---------|------------------------------|---------------------|----------------|-------|----------------|-------------|----------------|-------|----------------|-------------|----------------|-------|----------------|----------------|--------------------|
|         |                              | AUC                 | 95% CI         | Brier | 95% CI         | Sensitivity | 95% CI         | PPV   | 95% CI         | Specificity | 95% CI         | NPV   | 95% CI         | NumSelectedMin | 95% CI             |
| D1      | 1                            | 0.639               | (0.637, 0.642) | 0.212 | (0.211, 0.213) | 0.57        | (0.564, 0.576) | 0.448 | (0.445, 0.452) | 0.632       | (0.626, 0.638) | 0.738 | (0.735, 0.74)  | 187.17         | (179.257, 195.083) |
| D2      | 1                            | 0.65                | (0.648, 0.653) | 0.211 | (0.21, 0.212)  | 0.594       | (0.588, 0.601) | 0.456 | (0.453, 0.46)  | 0.623       | (0.616, 0.63)  | 0.743 | (0.74, 0.746)  | 169.72         | (166.629, 172.811) |
|         | 2                            | 0.673               | (0.67, 0.675)  | 0.207 | (0.206, 0.207) | 0.629       | (0.623, 0.634) | 0.475 | (0.472, 0.478) | 0.63        | (0.624, 0.636) | 0.762 | (0.759, 0.764) | 158.13         | (153.233, 163.027) |
| D3      | 1                            | 0.64                | (0.637, 0.643) | 0.219 | (0.218, 0.22)  | 0.589       | (0.582, 0.596) | 0.473 | (0.468, 0.477) | 0.613       | (0.605, 0.62)  | 0.718 | (0.714, 0.721) | 108.7          | (105.242, 112.158) |
|         | 2                            | 0.661               | (0.658, 0.664) | 0.215 | (0.214, 0.216) | 0.625       | (0.617, 0.633) | 0.49  | (0.485, 0.494) | 0.617       | (0.61, 0.623)  | 0.737 | (0.733, 0.741) | 130.04         | (123.352, 136.728) |
|         | 3                            | 0.672               | (0.669, 0.675) | 0.213 | (0.212, 0.214) | 0.621       | (0.613, 0.628) | 0.506 | (0.502, 0.511) | 0.643       | (0.636, 0.65)  | 0.743 | (0.74, 0.746)  | 138.95         | (133.1, 144.8)     |
| D4      | 1                            | 0.625               | (0.621, 0.628) | 0.228 | (0.227, 0.229) | 0.582       | (0.573, 0.59)  | 0.495 | (0.49, 0.5)    | 0.601       | (0.593, 0.61)  | 0.682 | (0.678, 0.687) | 88.34          | (80.673, 96.007)   |
|         | 2                            | 0.65                | (0.647, 0.654) | 0.224 | (0.223, 0.225) | 0.616       | (0.608, 0.625) | 0.518 | (0.512, 0.523) | 0.614       | (0.606, 0.623) | 0.706 | (0.701, 0.71)  | 82.39          | (73.7, 91.08)      |
|         | 3                            | 0.665               | (0.661, 0.668) | 0.22  | (0.219, 0.221) | 0.627       | (0.619, 0.635) | 0.528 | (0.523, 0.533) | 0.623       | (0.615, 0.631) | 0.714 | (0.71, 0.718)  | 115.33         | (108.193, 122.467) |
|         | 4                            | 0.668               | (0.664, 0.671) | 0.22  | (0.219, 0.221) | 0.631       | (0.623, 0.639) | 0.532 | (0.527, 0.537) | 0.627       | (0.62, 0.634)  | 0.718 | (0.713, 0.722) | 69.28          | (64.12, 74.44)     |
| D5      | 1                            | 0.631               | (0.627, 0.636) | 0.232 | (0.232, 0.233) | 0.578       | (0.568, 0.588) | 0.544 | (0.538, 0.551) | 0.62        | (0.609, 0.632) | 0.654 | (0.648, 0.659) | 29.52          | (25.264, 33.776)   |
|         | 2                            | 0.657               | (0.652, 0.661) | 0.228 | (0.227, 0.229) | 0.628       | (0.618, 0.638) | 0.562 | (0.556, 0.567) | 0.617       | (0.608, 0.626) | 0.681 | (0.675, 0.687) | 32.95          | (30.472, 35.428)   |
|         | 3                            | 0.67                | (0.665, 0.674) | 0.225 | (0.224, 0.226) | 0.627       | (0.617, 0.636) | 0.575 | (0.569, 0.581) | 0.637       | (0.628, 0.646) | 0.687 | (0.682, 0.693) | 47.85          | (44.78, 50.92)     |
|         | 4                            | 0.674               | (0.669, 0.679) | 0.224 | (0.223, 0.225) | 0.641       | (0.632, 0.65)  | 0.575 | (0.569, 0.581) | 0.628       | (0.618, 0.639) | 0.692 | (0.686, 0.698) | 42.8           | (39.861, 45.739)   |
|         | 5                            | 0.678               | (0.673, 0.683) | 0.223 | (0.222, 0.224) | 0.644       | (0.636, 0.653) | 0.578 | (0.572, 0.584) | 0.631       | (0.622, 0.641) | 0.695 | (0.69, 0.701)  | 54.98          | (51.864, 58.096)   |

XGBoost

| Dataset | Number of historical records | Performance Metrics |                |       |                |             |                |       |                |             |                |       |                |                |                  |
|---------|------------------------------|---------------------|----------------|-------|----------------|-------------|----------------|-------|----------------|-------------|----------------|-------|----------------|----------------|------------------|
|         |                              | AUC                 | 95% CI         | Brier | 95% CI         | Sensitivity | 95% CI         | PPV   | 95% CI         | Specificity | 95% CI         | NPV   | 95% CI         | NumSelectedMin | 95% CI           |
| D1      | 1                            | 0.645               | (0.642, 0.647) | 0.21  | (0.21, 0.211)  | 0.581       | (0.577, 0.584) | 0.441 | (0.438, 0.445) | 0.615       | (0.612, 0.619) | 0.737 | (0.734, 0.74)  | 16.63          | (16.312, 16.948) |
| D2      | 1                            | 0.637               | (0.635, 0.639) | 0.21  | (0.21, 0.211)  | 0.593       | (0.586, 0.6)   | 0.434 | (0.431, 0.437) | 0.587       | (0.579, 0.596) | 0.731 | (0.728, 0.733) | 17.13          | (16.88, 17.38)   |
|         | 2                            | 0.673               | (0.67, 0.675)  | 0.207 | (0.207, 0.208) | 0.59        | (0.584, 0.596) | 0.476 | (0.472, 0.48)  | 0.654       | (0.647, 0.66)  | 0.75  | (0.748, 0.753) | 20.21          | (19.907, 20.513) |
| D3      | 1                            | 0.634               | (0.631, 0.637) | 0.215 | (0.215, 0.216) | 0.598       | (0.588, 0.609) | 0.453 | (0.449, 0.457) | 0.574       | (0.563, 0.585) | 0.709 | (0.705, 0.713) | 19.21          | (18.934, 19.486) |
|         | 2                            | 0.668               | (0.665, 0.671) | 0.213 | (0.212, 0.213) | 0.591       | (0.583, 0.599) | 0.5   | (0.494, 0.505) | 0.65        | (0.64, 0.66)   | 0.73  | (0.727, 0.734) | 22.04          | (21.677, 22.403) |
|         | 3                            | 0.675               | (0.672, 0.679) | 0.211 | (0.21, 0.212)  | 0.579       | (0.572, 0.585) | 0.513 | (0.508, 0.519) | 0.677       | (0.67, 0.683)  | 0.732 | (0.729, 0.736) | 23.6           | (23.287, 23.913) |
| D4      | 1                            | 0.623               | (0.62, 0.627)  | 0.221 | (0.22, 0.221)  | 0.507       | (0.493, 0.52)  | 0.498 | (0.491, 0.504) | 0.652       | (0.638, 0.667) | 0.664 | (0.66, 0.669)  | 19.31          | (18.996, 19.624) |
|         | 2                            | 0.665               | (0.661, 0.669) | 0.218 | (0.217, 0.219) | 0.588       | (0.58, 0.597)  | 0.533 | (0.527, 0.538) | 0.652       | (0.643, 0.662) | 0.703 | (0.699, 0.707) | 23.11          | (22.738, 23.482) |
|         | 3                            | 0.68                | (0.677, 0.684) | 0.216 | (0.215, 0.216) | 0.608       | (0.6, 0.617)   | 0.55  | (0.543, 0.556) | 0.664       | (0.654, 0.673) | 0.717 | (0.713, 0.721) | 22.76          | (22.446, 23.074) |
|         | 4                            | 0.686               | (0.682, 0.689) | 0.215 | (0.215, 0.216) | 0.619       | (0.61, 0.628)  | 0.547 | (0.541, 0.554) | 0.655       | (0.645, 0.665) | 0.72  | (0.716, 0.724) | 22.21          | (21.835, 22.585) |
| D5      | 1                            | 0.638               | (0.632, 0.643) | 0.226 | (0.225, 0.227) | 0.524       | (0.503, 0.545) | 0.549 | (0.54, 0.557)  | 0.655       | (0.633, 0.676) | 0.641 | (0.635, 0.647) | 18.72          | (18.412, 19.028) |
|         | 2                            | 0.675               | (0.67, 0.68)   | 0.222 | (0.222, 0.223) | 0.623       | (0.611, 0.636) | 0.571 | (0.565, 0.576) | 0.632       | (0.62, 0.644)  | 0.684 | (0.679, 0.69)  | 22.01          | (21.613, 22.407) |
|         | 3                            | 0.685               | (0.68, 0.691)  | 0.222 | (0.221, 0.223) | 0.618       | (0.607, 0.629) | 0.583 | (0.577, 0.589) | 0.655       | (0.645, 0.664) | 0.688 | (0.682, 0.694) | 23.51          | (23.14, 23.88)   |
|         | 4                            | 0.684               | (0.679, 0.689) | 0.222 | (0.221, 0.223) | 0.625       | (0.613, 0.637) | 0.585 | (0.578, 0.591) | 0.651       | (0.638, 0.663) | 0.691 | (0.685, 0.697) | 23.89          | (23.499, 24.281) |
|         | 5                            | 0.686               | (0.681, 0.691) | 0.222 | (0.221, 0.223) | 0.625       | (0.613, 0.637) | 0.58  | (0.574, 0.587) | 0.645       | (0.633, 0.656) | 0.689 | (0.683, 0.696) | 23.9           | (23.518, 24.282) |

Random Forest

| Dataset | Number of historical records | Performance Metrics |                |       |                |             |                |       |                |             |                |       |                |                |                    |
|---------|------------------------------|---------------------|----------------|-------|----------------|-------------|----------------|-------|----------------|-------------|----------------|-------|----------------|----------------|--------------------|
|         |                              | AUC                 | 95% CI         | Brier | 95% CI         | Sensitivity | 95% CI         | PPV   | 95% CI         | Specificity | 95% CI         | NPV   | 95% CI         | NumSelectedMin | 95% CI             |
| D1      | 1                            | 0.655               | (0.653, 0.658) | 0.231 | (0.23, 0.231)  | 0.597       | (0.592, 0.603) | 0.445 | (0.442, 0.449) | 0.61        | (0.604, 0.616) | 0.743 | (0.741, 0.746) | 313.82         | (311.728, 315.912) |
| D2      | 1                            | 0.648               | (0.645, 0.65)  | 0.232 | (0.232, 0.232) | 0.584       | (0.577, 0.592) | 0.447 | (0.443, 0.45)  | 0.614       | (0.606, 0.622) | 0.736 | (0.733, 0.738) | 242.59         | (241.314, 243.866) |
|         | 2                            | 0.678               | (0.675, 0.68)  | 0.23  | (0.229, 0.23)  | 0.604       | (0.597, 0.61)  | 0.475 | (0.472, 0.479) | 0.645       | (0.637, 0.652) | 0.754 | (0.752, 0.756) | 322.69         | (320.853, 324.527) |
| D3      | 1                            | 0.646               | (0.643, 0.649) | 0.235 | (0.235, 0.235) | 0.577       | (0.569, 0.585) | 0.472 | (0.467, 0.476) | 0.619       | (0.611, 0.628) | 0.714 | (0.71, 0.718)  | 232.18         | (231.05, 233.31)   |
|         | 2                            | 0.674               | (0.67, 0.677)  | 0.233 | (0.233, 0.233) | 0.605       | (0.597, 0.612) | 0.505 | (0.5, 0.51)    | 0.65        | (0.641, 0.658) | 0.737 | (0.733, 0.74)  | 324.92         | (322.848, 326.992) |
|         | 3                            | 0.686               | (0.683, 0.69)  | 0.232 | (0.232, 0.232) | 0.603       | (0.597, 0.61)  | 0.518 | (0.513, 0.524) | 0.67        | (0.663, 0.676) | 0.742 | (0.738, 0.745) | 317.8          | (315.655, 319.945) |
| D4      | 1                            | 0.64                | (0.637, 0.644) | 0.238 | (0.238, 0.239) | 0.573       | (0.564, 0.582) | 0.501 | (0.495, 0.506) | 0.615       | (0.605, 0.625) | 0.683 | (0.679, 0.688) | 230.47         | (229.301, 231.639) |
|         | 2                            | 0.679               | (0.676, 0.683) | 0.236 | (0.236, 0.236) | 0.625       | (0.616, 0.634) | 0.54  | (0.535, 0.546) | 0.643       | (0.634, 0.652) | 0.72  | (0.715, 0.724) | 326.58         | (324.607, 328.553) |
|         | 3                            | 0.69                | (0.686, 0.693) | 0.235 | (0.235, 0.235) | 0.615       | (0.609, 0.622) | 0.556 | (0.549, 0.562) | 0.669       | (0.661, 0.677) | 0.722 | (0.718, 0.726) | 321.83         | (319.897, 323.763) |
|         | 4                            | 0.694               | (0.691, 0.698) | 0.235 | (0.235, 0.235) | 0.619       | (0.612, 0.627) | 0.559 | (0.553, 0.564) | 0.671       | (0.664, 0.678) | 0.725 | (0.721, 0.729) | 319.95         | (318.237, 321.663) |
| D5      | 1                            | 0.647               | (0.643, 0.652) | 0.241 | (0.241, 0.242) | 0.595       | (0.584, 0.606) | 0.544 | (0.538, 0.551) | 0.61        | (0.599, 0.621) | 0.66  | (0.654, 0.665) | 216.94         | (215.794, 218.086) |
|         | 2                            | 0.681               | (0.676, 0.686) | 0.239 | (0.239, 0.239) | 0.625       | (0.616, 0.634) | 0.581 | (0.575, 0.586) | 0.647       | (0.638, 0.655) | 0.689 | (0.684, 0.695) | 311.26         | (309.272, 313.248) |
|         | 3                            | 0.69                | (0.684, 0.695) | 0.239 | (0.238, 0.239) | 0.619       | (0.61, 0.628)  | 0.596 | (0.589, 0.602) | 0.67        | (0.661, 0.68)  | 0.693 | (0.688, 0.699) | 311.79         | (309.837, 313.743) |
|         | 4                            | 0.692               | (0.687, 0.697) | 0.238 | (0.238, 0.239) | 0.635       | (0.626, 0.644) | 0.592 | (0.586, 0.599) | 0.658       | (0.649, 0.667) | 0.698 | (0.693, 0.704) | 315.35         | (313.684, 317.016) |
|         | 5                            | 0.696               | (0.691, 0.701) | 0.238 | (0.238, 0.239) | 0.641       | (0.631, 0.65)  | 0.592 | (0.586, 0.598) | 0.655       | (0.646, 0.663) | 0.701 | (0.695, 0.707) | 311.86         | (310.218, 313.502) |
