# Supplementary material for: Contribution of temporal data to predictive performance in 30-day readmission of morbidly obese patients
Source: PeerJ journal article supplement (doi:10.7717/peerj.3230), 2017-04-25

Supplement 2. Performance of Random Forest predictive models.

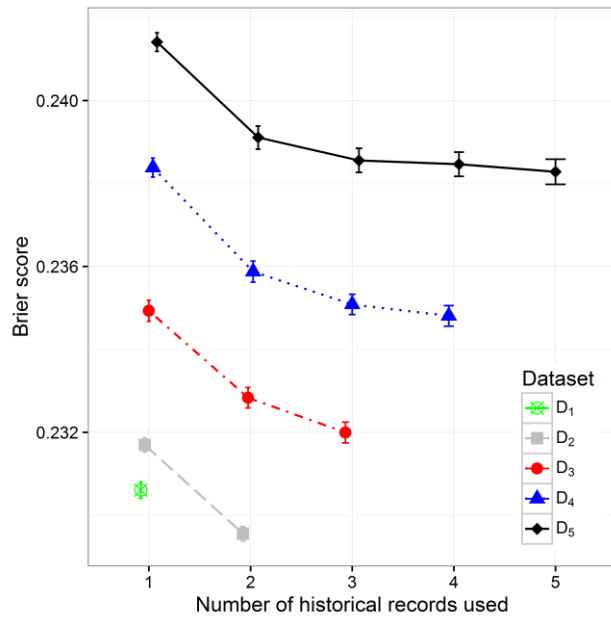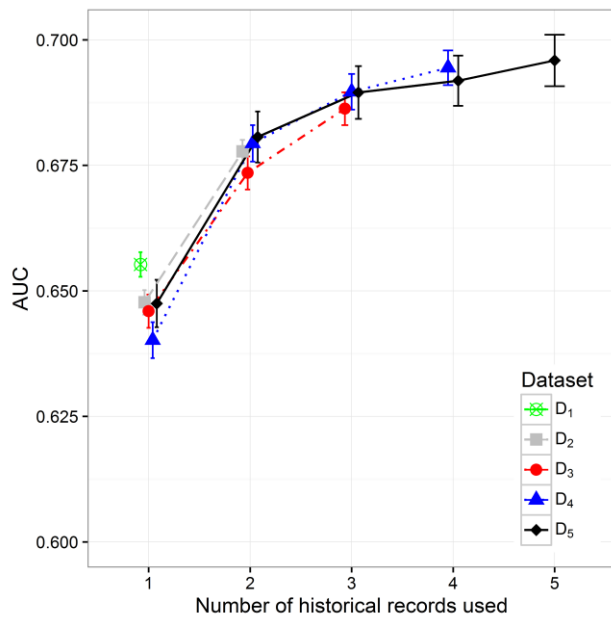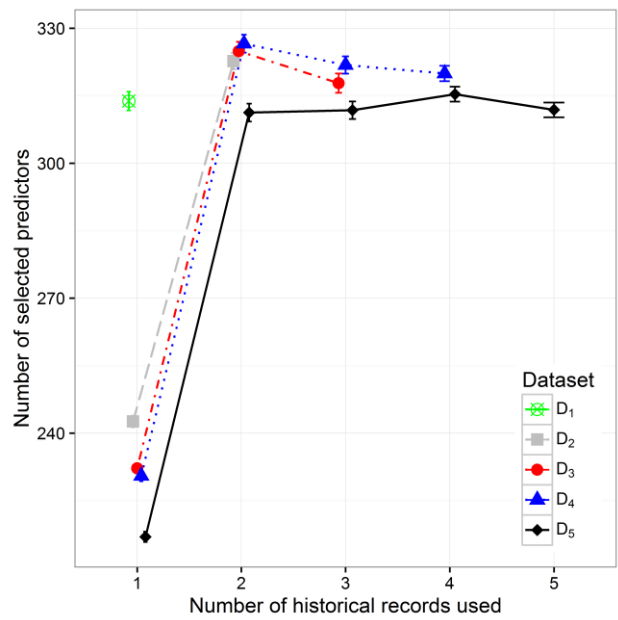

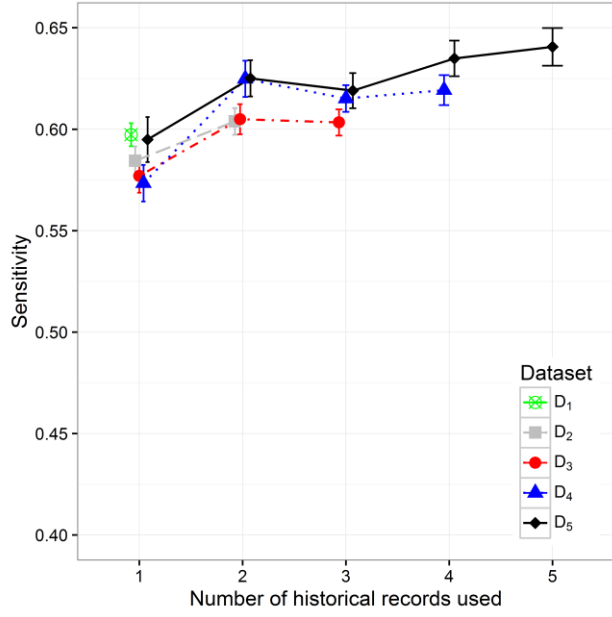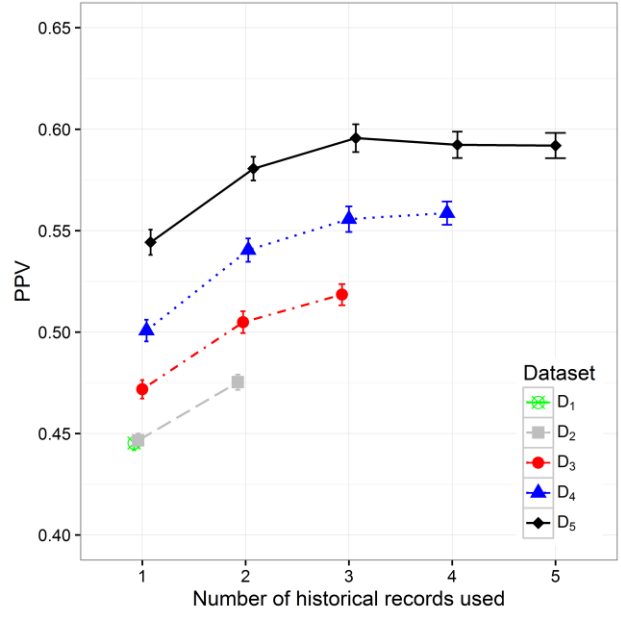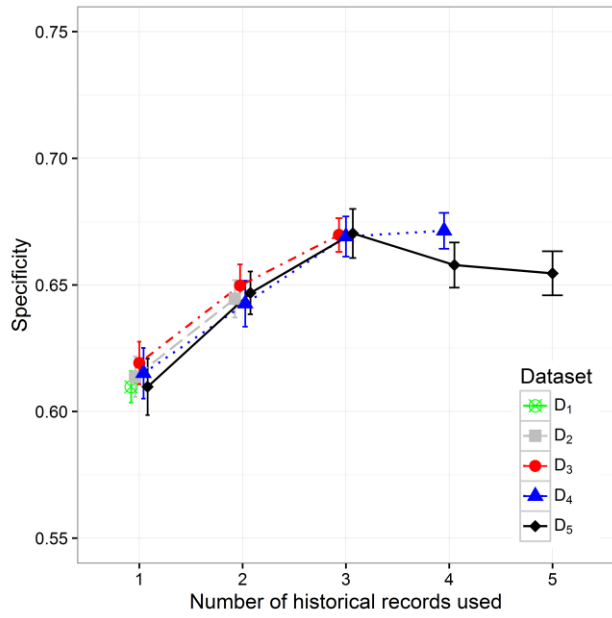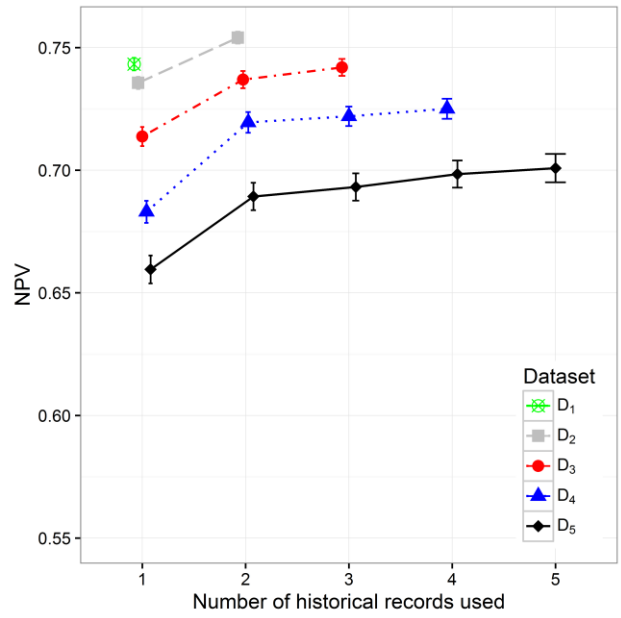

Supplement: Supplement2.pdf [file Supplement2.pdf]
