# Supplementary material for: Contribution of temporal data to predictive performance in 30-day readmission of morbidly obese patients
Source: PeerJ journal article supplement (doi:10.7717/peerj.3230), 2017-04-25

Supplement 3. Performance of XGBoost predictive models.

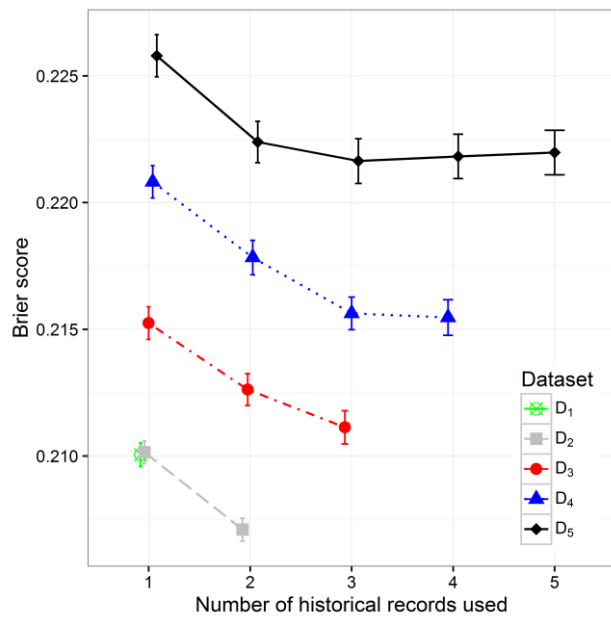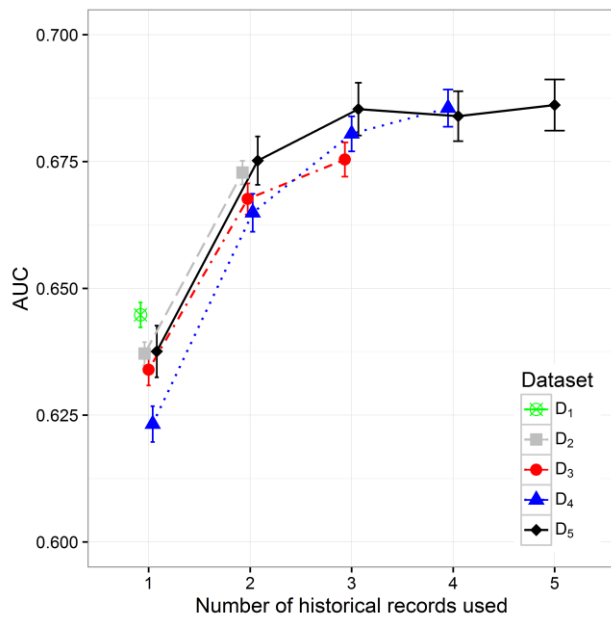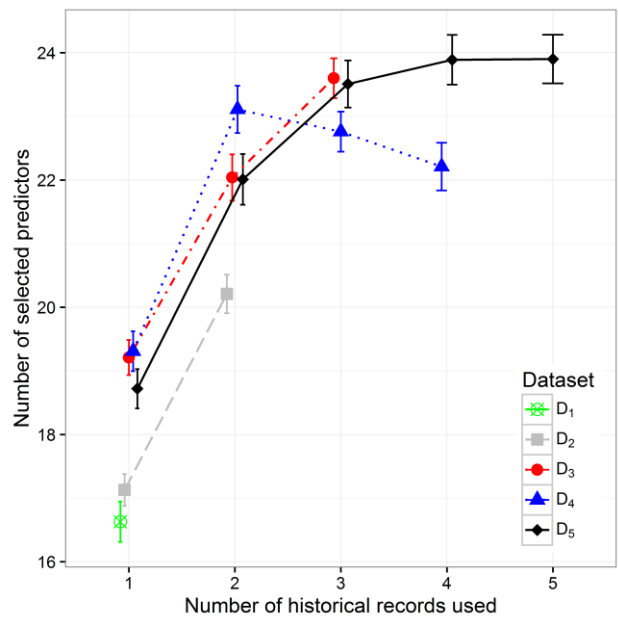

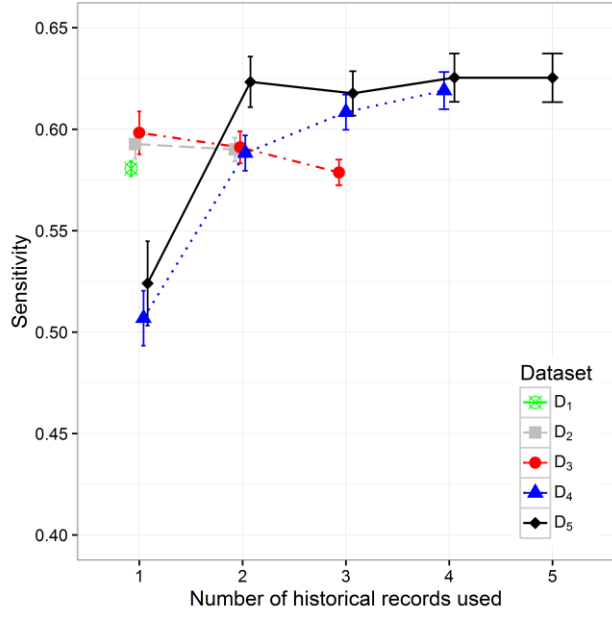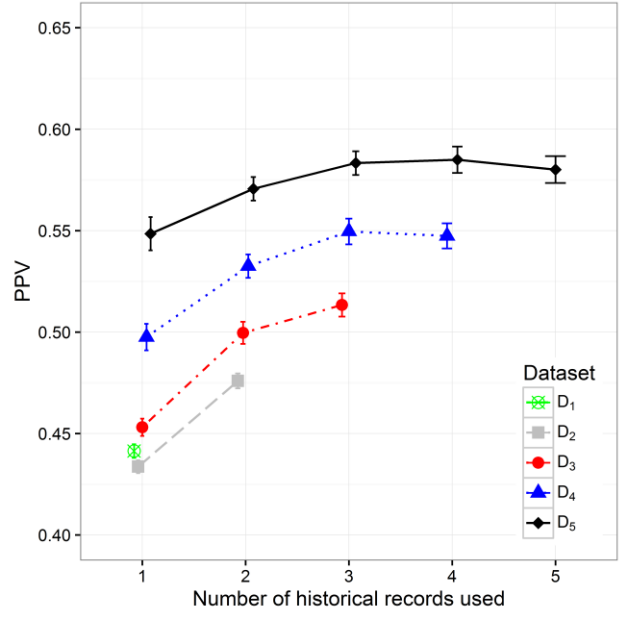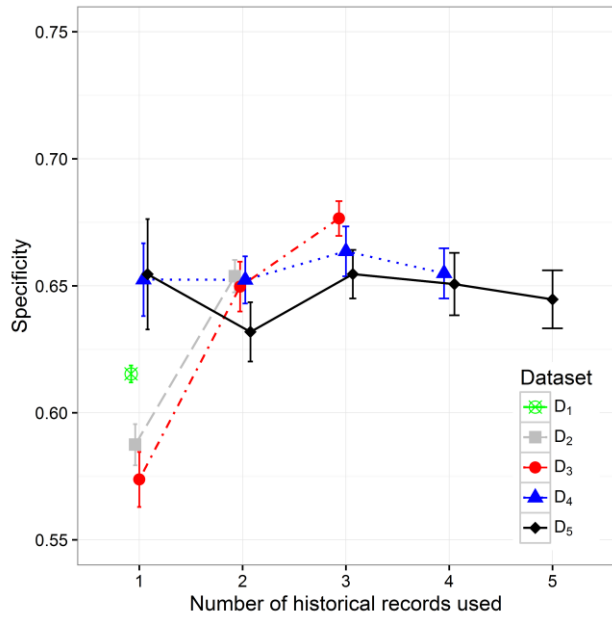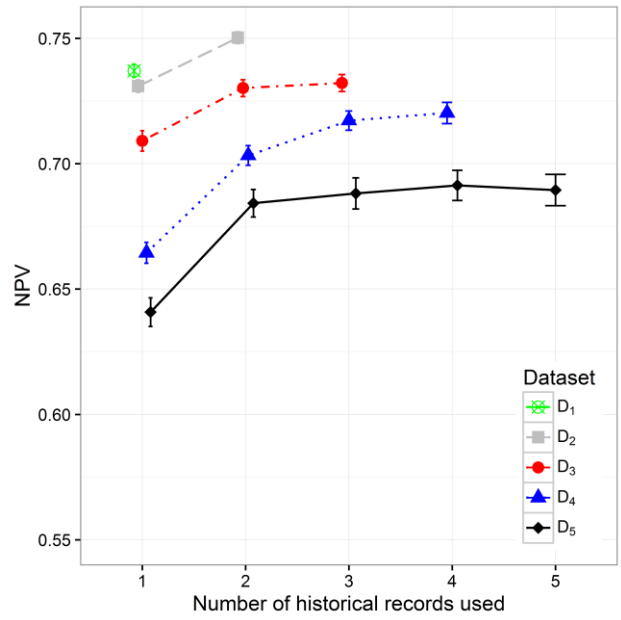

Supplement: Supplement3.pdf [file Supplement3.pdf]
